# Supplementary material for: Machine Learning-Based Individualized Prediction: Risk Assessment of Retinopathy in Preterm Infants at High Altitude
Source: Research Square preprint supplement (doi:10.21203/rs.3.rs-8533267/v1), 2026-01-16
Supplement: Supplementary file 1 [file b08f801fc92ec5fd31771ca8.docx]

**Table S1A.** Univariate comparison of categorical variables between infants with and without ROP in the training set

| **Characteristic** | **Non-lesion group**  **(n=1297)** | **Pathological group(N=173)** | **p value** |
| --- | --- | --- | --- |
| Male, n (%) | 718(55.4) | 111(64.2) | 0.035 |
| Altitude category, n (%) |  |  | 0.862 |
| Low (<1500 m) | 2(0.2) | 0(0) |  |
| Middle (1500～2500 m) | 705(54.4) | 93(53.8) |  |
| High (≥2500 m) | 590(45.5) | 80(46.2) |  |
| Mode of delivery (cesarean section), n (%) | 911(70.2) | 89(51.4) | <.001 |
| Premature rupture of membranes, n (%) | 430(33.2) | 80(46.2) | <.001 |
| Fetal distress, n (%) | 271(20.9) | 38(22) | 0.822 |
| Gestational diabetes mellitus, n (%) | 153(11.8) | 20(11.6) | 1.000 |
| Gestational hypertension, n (%) | 248(19.1) | 25(14.5) | 0.168 |
| Intrahepatic cholestasis of pregnancy, n (%) | 76(5.9) | 13(7.5) | 0.492 |
| Gestational hypothyroidism, n (%) | 151(11.6) | 17(9.8) | 0.563 |
| Obstetric antiphospholipid syndrome, n (%) | 14(1.1) | 2(1.2) | 1.000 |
| Antenatal corticosteroid exposure, n (%) | 741(57.1) | 117(67.6) | 0.011 |
| Multiple gestation, n (%) | 344(26.5) | 53(30.6) | 0.292 |
| Pulmonary hypertension, n (%) | 228(17.6) | 45(26) | 0.010 |
| Respiratory failure, n (%) | 647(49.9) | 61(35.3) | <.001 |
| Respiratory distress syndrome, n (%) | 911(70.2) | 144(83.2) | <.001 |
| Sepsis , n (%) | 595(45.9) | 87(50.3) | 0.311 |
| Patent ductus arteriosus, n (%) | 579(44.6) | 76(43.9) | 0.924 |
| Patent foramen ovale, n (%) | 1003(77.3) | 140(80.9) | 0.332 |
| Bronchopulmonary dysplasia, n (%) | 128(9.9) | 80(46.2) | <.001 |
| Necrotizing enterocolitis, n (%) | 23(1.8) | 15(8.7) | <.001 |
| Hyperlactatemia (diagnosis), n (%) | 243(18.7) | 52(30.1) | <.001 |
| Hyperbilirubinemia (diagnosis), n (%) | 823(63.5) | 140(80.9) | <.001 |
| Intracranial hemorrhage, n (%) | 143(11) | 29(16.8) | 0.038 |
| Coagulation dysfunction, n (%) | 675(52) | 117(67.6) | <.001 |
| Perinatal asphyxia, n (%) | 188(14.5) | 95(54.9) | <.001 |
| Blood component transfusion, n (%) | 455(35.1) | 118(68.2) | <.001 |
| Pulmonary surfactant administration, n (%) | 232(17.9) | 112(64.7) | <.001 |
| Respiratory support mode, n (%) |  |  | <.001 |
| Non-invasive | 337(26) | 30(17.3) |  |
| Invasive or invasive + non-invasive | 485(37.4) | 119(68.8) |  |
| Not used | 475(36.6) | 24(13.9) |  |
| Invasive mechanical ventilation, n (%) | 476(36.7) | 116(67.1) | <.001 |

**Footnote (S1A)**: Data are presented as n (%). p values were calculated using the chi-square test or Fisher’s exact test, as appropriate.

**Abbreviations**: ROP, retinopathy of prematurity.

**Table S1B.** Univariate comparison of continuous variables between infants with and without ROP in the training set

| **Characteristic** | **Non-lesion group**  **(n=1297)** | **Pathological group**  **(N=173)** | **p value** |
| --- | --- | --- | --- |
| Number of blood transfusions, median (IQR) | 0.00(0.00, 1.00) | 3.00(0.00, 6.00) | <.001 |
| Duration of respiratory support, days, median (IQR) | 5.00(0.00, 12.00) | 14.00(5.00, 35.00) | <.001 |
| Oxygen administration time, days, median (IQR) | 14.00(6.00, 25.00) | 40.00(18.00, 62.00) | <.001 |
| Fraction of inspired oxygen (FiO₂), %, median (IQR) | 25.00(23.00, 30.00) | 35.00(25.00, 50.00) | <.001 |
| Gestational age, weeks, median (IQR) | 34.29(33.00, 35.57) | 31.00(29.00, 33.43) | <.001 |
| Corrected gestational age, weeks, median (IQR) | 36.43(35.43, 37.57) | 36.14(35.29, 38.00) | 0.990 |
| Birth weight, g, median (IQR) | 1990.00(1670.00, 2250.00) | 1490.00(1180.00, 1880.00) | <.001 |
| Apgar score at 1 min, median (IQR) | 8.00(7.00, 9.00) | 7.00(4.00, 8.00) | <.001 |
| Apgar score at 5 min, median (IQR) | 9.00(8.00, 10.00) | 8.00(6.00, 9.00) | <.001 |
| Lactic acid, median (IQR) | 2.50(1.80, 3.70) | 3.40(2.10, 5.30) | <.001 |
| Oxygen saturation, %, median (IQR) | 96.20(93.00, 98.10) | 95.80(92.70, 98.10) | 0.485 |
| Partial pressure of carbon dioxide, median (IQR) | 36.60(31.30, 42.10) | 37.00(32.70, 43.50) | 0.081 |
| Parenteral nutrition duration, days, median (IQR) | 15.00(10.00, 22.00) | 32.00(20.00, 52.00) | <.001 |
| Fasting duration, days, median (IQR) | 1.00(0.00, 2.00) | 2.00(0.00, 4.00) | <.001 |
| White blood cell count, median (IQR) | 9.40(7.20, 12.60) | 9.30(6.40, 13.40) | 0.825 |
| Lymphocyte count, median (IQR) | 3.47(2.60, 4.50) | 3.60(2.70, 5.05) | 0.015 |
| Hemoglobin, median (IQR) | 179.00(165.00, 191.00) | 174.00(157.00, 184.00) | <.001 |
| Red blood cell count, median (IQR) | 4.77(4.39, 5.11) | 4.49(4.11, 4.86) | <.001 |
| Hematocrit, median (IQR) | 53.90(49.30, 57.80) | 52.60(47.30, 56.00) | 0.003 |
| RDW-CV, median (IQR) | 15.80(15.10, 16.70) | 16.00(15.10, 16.70) | 0.333 |
| RDW-SD, median (IQR) | 64.50(60.90, 69.70) | 66.70(62.20, 72.10) | 0.003 |
| Platelet count, median (IQR) | 246.00(204.00, 287.00) | 229.00(185.00, 279.00) | 0.005 |
| Neutrophil count, median (IQR) | 4.70(3.18, 7.30) | 4.20(2.50, 7.10) | 0.029 |
| Alanine aminotransferase, median (IQR) | 6.00(4.00, 10.00) | 7.00(4.00, 11.00) | 0.238 |
| Total bile acids, μmol/L, median (IQR) | 8.80(5.80, 13.10) | 11.20(7.40, 17.90) | <.001 |
| Aspartate aminotransferase, median (IQR) | 37.00(27.00, 53.00) | 38.00(25.00, 53.00) | 0.840 |
| Albumin, mean ± SD | 30.73±3.94 | 28.75±4.24 | <.001 |
| Total bilirubin, μmol/L, median (IQR) | 93.60(59.40, 130.60) | 89.30(64.60, 126.90) | 0.431 |
| Procalcitonin, median (IQR) | 0.84(0.23, 3.75) | 1.44(0.32, 5.84) | 0.045 |
| Serum 25-hydroxyvitamin D3, median (IQR) | 23.18(18.66, 29.55) | 26.54(20.55, 35.30) | <.001 |

**Footnote (S1B)**: Continuous variables are presented as mean ± SD for normally distributed data and as median (IQR) for non-normally distributed data. p values were calculated using the independent-samples t-test or Mann–Whitney U test, as appropriate.

**Abbreviations**: FiO₂, fraction of inspired oxygen; IQR, interquartile range; RDW, red blood cell distribution width; ROP, retinopathy of prematurity.

**Table S2.** Optimal hyperparameter configurations for the nine machine learning models after Bayesian optimization.

| **Model** | **Optimal Hyperparameters** |
| --- | --- |
| Logistic regression | C=10.0, penalty='elasticnet', l1_ratio=1.0 |
| Decision tree | criterion='gini', max_depth=10, max_features=0.5, min_samples_split=10, min_samples_leaf=15 |
| Random forest | bootstrap=True, max_depth=12, max_features=0.5, min_samples_split=10, min_samples_leaf=5, n_estimators=100 |
| XGBoost | max_depth=7, learning_rate=0.30, n_estimators=100, min_child_weight=1, subsample=0.75, colsample_bytree=0.40, gamma=0.0, reg_alpha=0.0144, reg_lambda~0 |
| Support vector machine (RBF) | C=10.0, kernel='rbf', gamma=0.1 |
| Gaussian naive Bayes | var_smoothing=2.89×10⁻¹⁰ |
| Multilayer perceptron | activation='logistic', solver='adam', alpha=1e-5, learning_rate_init=0.0063 |
| TabNet | n_d=34, n_a=27, n_steps=4, gamma=1.65, lambda_sparse≈1.68×10⁻⁵, learning_rate=0.0147 |
| LightGBM | max_depth=11, num_leaves=133, learning_rate=0.30, n_estimators=100, min_child_samples=5, subsample=0.6, colsample_bytree=0.531, reg_alpha=0.000789, reg_lambda≈4.15×10⁻⁷ |

Note: values rounded.

**Table S3.** Delong's test for comparing the AUC differences between selected models on the independent test set.

| **Comparison (Model A vs. Model B)** | **AUC Difference**  **(A - B)** | **95%CI** | **Z statistic** | ***P*value** |
| --- | --- | --- | --- | --- |
| TabNet vs Soft-voting ensemble | -0.129 | -0.179 to -0.079 | -5.029 | <0.001 |
| Decision tree vs TabNet | 0.134 | 0.08 to 0.188 | 4.885 | <0.001 |
| Support vector machine vs Soft-voting ensemble | -0.095 | -0.135 to- 0.055 | -4.668 | <0.001 |
| Logistic regression vs TabNet | 0.120 | 0.069 to 0.172 | 4.591 | <0.001 |
| RandomForest vs TabNet | 0.113 | 0.063 to 0.162 | 4.494 | <0.001 |
| RandomForest vs Support vector machine | 0.079 | 0.044 to 0.113 | 4.469 | <0.001 |
| Decision tree vs Support vector machine | 0.100 | 0.055 to 0.145 | 4.382 | <0.001 |
| GaussianNB vs TabNet | 0.117 | 0.063 to 0.172 | 4.199 | <0.001 |
| Logistic regression vs Support vector machine | 0.086 | 0.045 to 0.128 | 4.099 | <0.001 |
| LightGBM vs Soft-voting ensemble | -0.081 | -0.123 to -0.039 | -3.799 | <0.001 |
| Support vector machine vs GaussianNB | -0.083 | -0.127 to -0.04 | -3.794 | <0.001 |
| Decision tree vs LightGBM | 0.086 | 0.041 to 0.132 | 3.693 | <0.001 |
| RandomForest vs LightGBM | 0.065 | 0.028 to 0.102 | 3.440 | 0.001 |
| Decision tree vs Multilayer perceptron | 0.045 | 0.019 to 0.071 | 3.426 | 0.001 |
| Multilayer perceptron vs TabNet | 0.089 | 0.037 to 0.14 | 3.395 | 0.001 |
| Logistic regression vs LightGBM | 0.072 | 0.03 to 0.116 | 3.309 | 0.001 |
| Multilayer perceptron vs Soft-voting ensemble | -0.040 | -0.065 to -0.016 | -3.250 | 0.001 |
| GaussianNB vs LightGBM | 0.069 | 0.027 to 0.112 | 3.206 | 0.001 |
| XGBoost vs LightGBM | 0.038 | 0.014 to 0.062 | 3.112 | 0.002 |
| XGBoost vs TabNet | 0.086 | 0.031 to 0.14 | 3.095 | 0.002 |
| Decision tree vs XGBoost | 0.048 | 0.017 to 0.079 | 3.041 | 0.002 |
| XGBoost vs Soft-voting ensemble | -0.043 | -0.071 to -0.015 | -3.037 | 0.002 |
| RandomForest vs Soft-voting ensemble | -0.016 | -0.027 to -0.006 | -2.973 | 0.003 |
| XGBoost vs Support vector machine | 0.052 | 0.017 to 0.087 | 2.873 | 0.004 |
| Logistic regression vs Multilayer perceptron | 0.031 | 0.007 to 0.057 | 2.495 | 0.013 |
| Decision tree vs RandomForest | 0.021 | 0.004 to 0.039 | 2.432 | 0.015 |
| Support vector machine vs Multilayer perceptron | -0.055 | -0.101 to -0.008 | -2.302 | 0.021 |
| Logistic regression vs XGBoost | 0.034 | 0.005 to 0.064 | 2.263 | 0.024 |
| RandomForest vs XGBoost | 0.027 | 0.002 to 0.051 | 2.138 | 0.033 |
| XGBoost vs GaussianNB | -0.031 | -0.064 to 0.001 | -1.893 | 0.058 |
| GaussianNB vs Multilayer perceptron | 0.028 | -0.003 to 0.061 | 1.781 | 0.075 |
| Multilayer perceptron vs LightGBM | 0.041 | -0.005 to 0.087 | 1.739 | 0.082 |
| Decision tree vs GaussianNB | 0.017 | -0.002 to 0.036 | 1.711 | 0.087 |
| Logistic regression vs Decision tree | -0.014 | -0.03 to 0.002 | -1.662 | 0.097 |
| RandomForest vs Multilayer perceptron | 0.024 | -0.005 to 0.053 | 1.610 | 0.107 |
| Logistic regression vs Soft-voting ensemble | -0.009 | -0.019 to 0.002 | -1.609 | 0.108 |
| TabNet vs LightGBM | -0.048 | -0.107 to 0.012 | -1.559 | 0.119 |
| GaussianNB vs Soft-voting ensemble | -0.012 | -0.027 to 0.004 | -1.476 | 0.140 |
| Support vector machine vs TabNet | 0.034 | -0.017 to 0.085 | 1.304 | 0.192 |
| Decision tree vs Soft-voting ensemble | 0.005 | -0.004 to 0.014 | 1.055 | 0.292 |
| Logistic regression vs RandomForest | 0.007 | -0.008 to 0.023 | 0.973 | 0.331 |
| Support vector machine vs LightGBM | -0.014 | -0.052 to 0.025 | -0.695 | 0.487 |
| RandomForest vs GaussianNB | -0.004 | -0.023 to 0.014 | -0.506 | 0.613 |
| Logistic regression vs GaussianNB | 0.003 | -0.011 to 0.017 | 0.425 | 0.671 |
| XGBoost vs Multilayer perceptron | -0.003 | -0.036 to 0.031 | -0.156 | 0.876 |


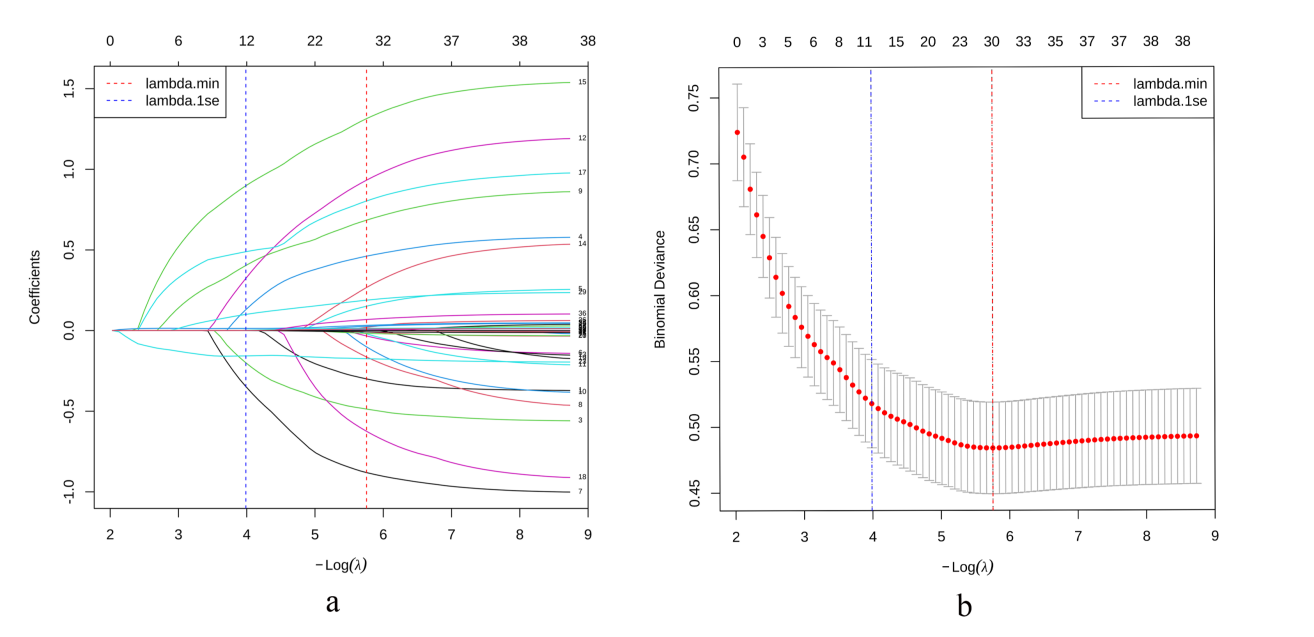


**Figure 1S**. Feature selection using LASSO regression with 10-fold cross-validation.

(a) Cross-validation curve of the LASSO logistic regression model. The red dots represent the mean cross-validated binomial deviance, and the grey bars indicate ±1 standard error (SE). The vertical dashed lines mark λ.min (minimum mean deviance) and λ.1se (the largest λ within 1 SE of the minimum). The numbers on the top axis denote the number of non-zero coefficients at each λ.

(b) LASSO coefficient profiles (regularization paths) of candidate predictors plotted against −log(λ). Each curve represents one predictor’s coefficient. The vertical dashed lines indicate λ.min and λ.1se; λ.1se was selected to obtain a parsimonious feature set, yielding 11 predictors retained in the final model.
